# Supplementary material for: Near-infrared phosphorescent terpyridine osmium(ii) photosensitizer complexes for photodynamic and photooxidation therapy
Source: Royal Society of Chemistry journal article supplement (doi:10.1039/d0qi00846j), 2020-01-01
Supplement: d0qi00846j1.pdf [file d0qi00846j1.pdf]

## Supporting Information

### **Near-infrared phosphorescent terpyridine osmium(II) complexes photosensitizers for photodynamic and photooxidation therapy**

Chen Ge,<sup>‡</sup> Jiayi Zhu,<sup>‡</sup> Ai Ouyang,<sup>‡</sup> Nong Lu, Yi Wang, Qianling Zhang, Pingyu Zhang\*

College of Chemistry and Environmental Engineering, Shenzhen University, Shenzhen, 518060, P.  
R. China. E-mail: p.zhang6@szu.edu.cn (P. Y. Z.)

## Contents

- Figure S1.** The  $^1\text{H}$  NMR spectrum of **Os1** in the DMSO- $d^6$  solution.
- Figure S2.** The  $^{13}\text{C}$  NMR spectrum of **Os1** in the DMSO- $d^6$  solution.
- Figure S3.** The ESI-MS spectrum of **Os1** ( $\text{CH}_3\text{OH}$ ).
- Figure S4.** The  $^1\text{H}$  NMR spectrum of **Os2** in the DMSO- $d^6$  solution
- Figure S5.** The  $^{13}\text{C}$  NMR spectrum of **Os2** in the DMSO- $d^6$  solution.
- Figure S6.** The ESI-MS spectrum of **Os2** ( $\text{CH}_3\text{OH}$ ).
- Figure S7.** The  $^1\text{H}$  NMR spectrum of **Os3** in the DMSO- $d^6$  solution.
- Figure S8.** The  $^{13}\text{C}$  NMR spectrum of **Os3** in the DMSO- $d^6$  solution.
- Figure S9.** The ESI-MS spectrum of **Os3** ( $\text{CH}_3\text{OH}$ ).
- Figure S10.** The phosphorescence lifetimes of **Os1-Os3**.
- Figure S11.** The stability of **Os1-Os3** in PBS solution for 24 h.
- Figure S12.** The photostability and thermal effects of **Os1-Os3** solution under 465 nm light irradiation.
- Figure S13.** The photostability and thermal effects of **Os1-Os3** solution under 633 nm light irradiation.
- Figure S14.** The confocal microscopy images of Hep-G2 cells stained with **Os1-Os3**.
- Figure S15.** The confocal microscopy images of Hep-G2 cells treated with **Os1-Os3** and Lyso-Tracker Red.
- Figure S16.** The confocal microscopy images of the A549 cells colabeled with **Os1-Os3** and Hoechst 33258.
- Figure S17.**  $^1\text{O}_2$  generation yield: Changes in absorbance of RNO at 440 nm against irradiation time in the presence of **Os1-Os3**.
- Figure S18.** Cell viability of LO2 cells treated with **Os1-Os3**.
- Table S1.** Data of the HOMO-LUMO values of **Os1-Os3**.
- Table S2.** The  $\text{IC}_{50}$  values of **Os1-Os3**.
- Table S3.** The TON values of the osmium complexes for photo-oxidation of NADH.

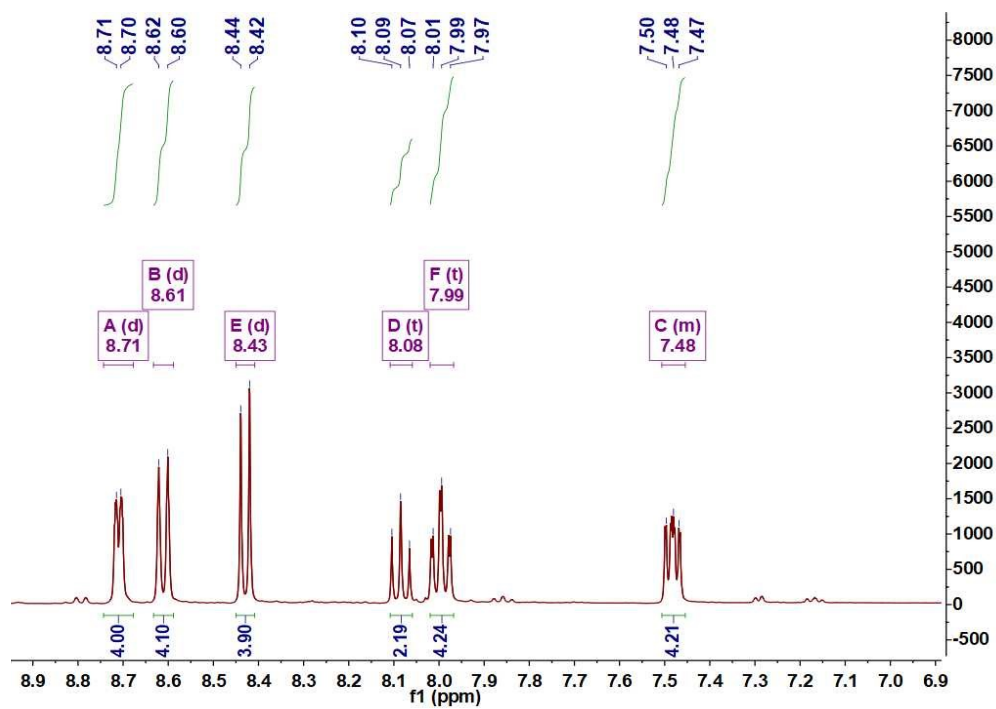

**Figure S1.** The 500 MHz  $^1\text{H}$  NMR spectrum of **Os1** in the  $\text{DMSO-d}_6$  solution.

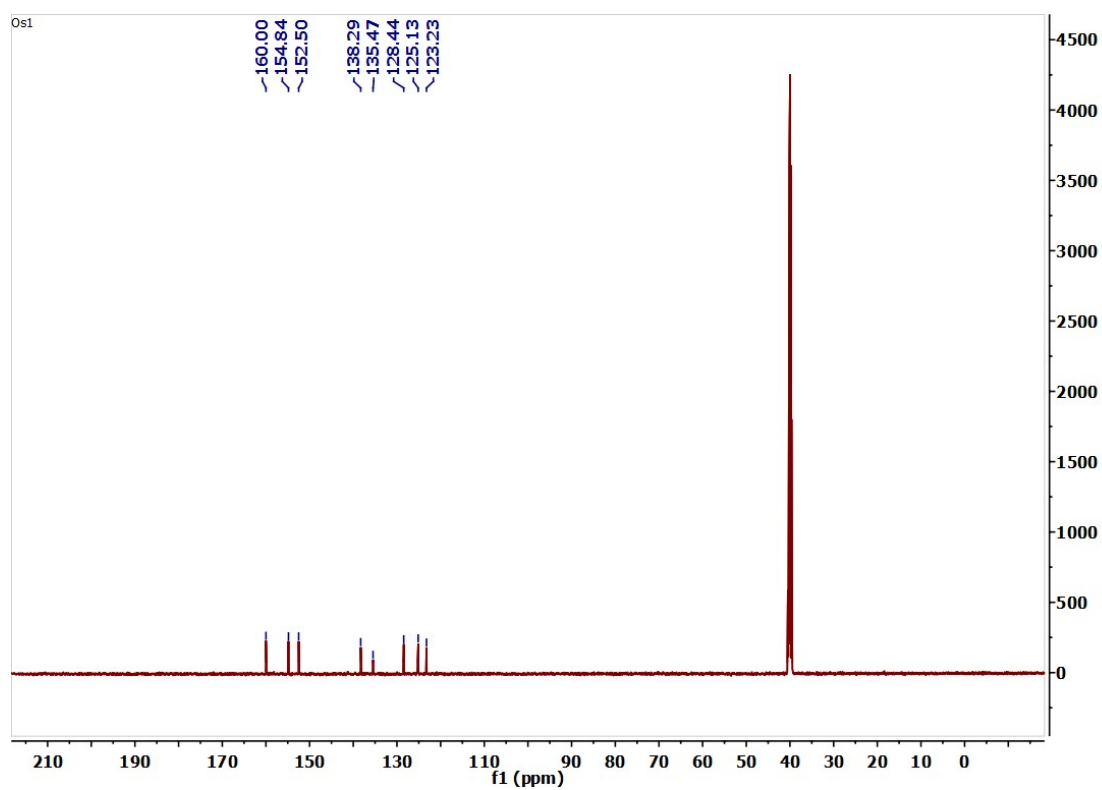

**Figure S2.** The 126 MHz  $^{13}\text{C}$  NMR spectrum of **Os1** in the  $\text{DMSO-d}_6$  solution.

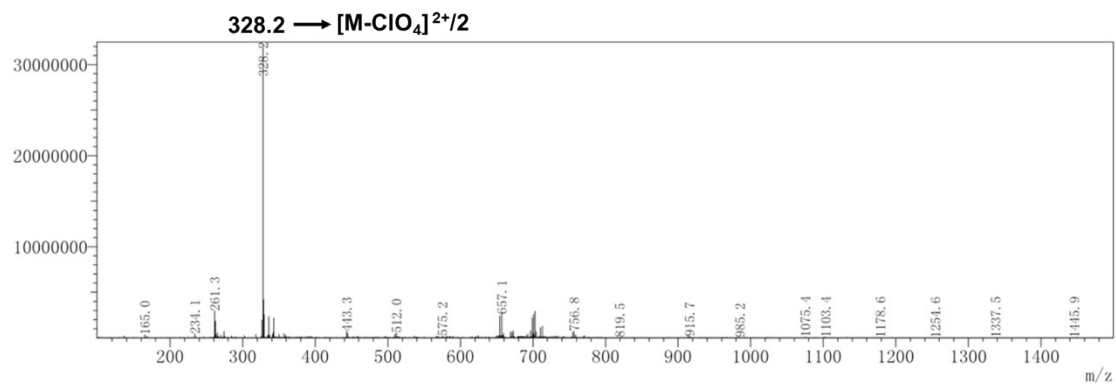

**Figure S3.** The ESI-MS spectrum of **Os1** ( $\text{CH}_3\text{OH}$ ).

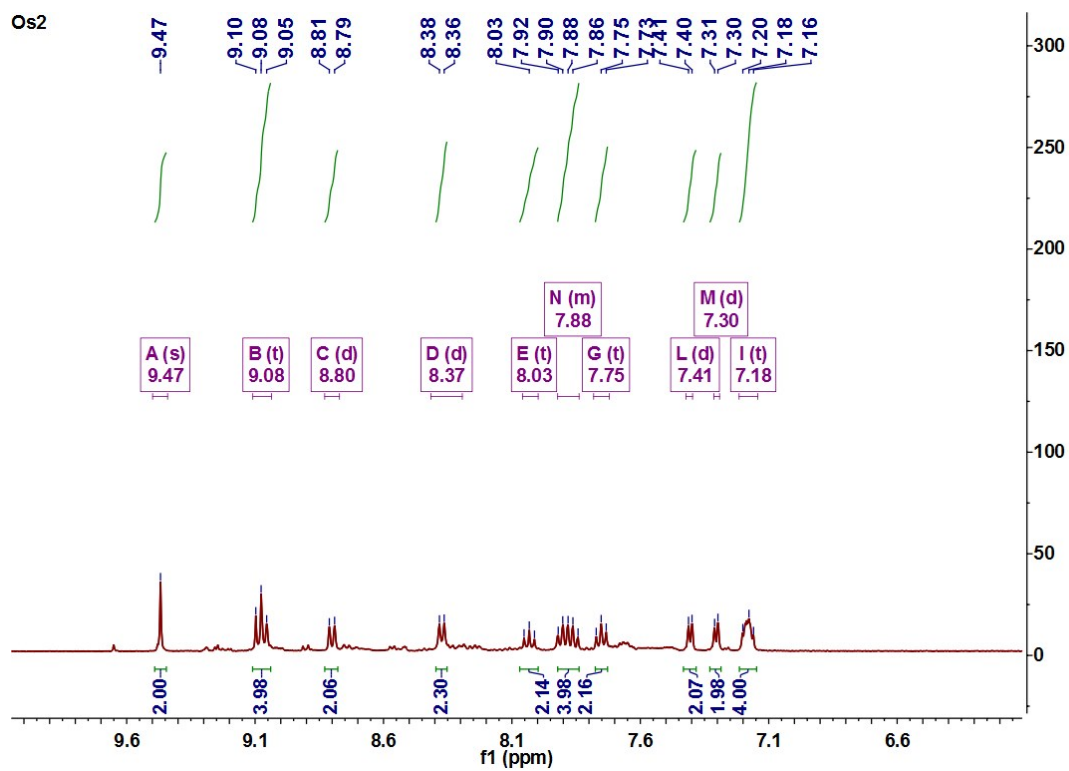

**Figure S4.** The 500 MHz  $^1\text{H}$  NMR spectrum of **Os2** in the  $\text{DMSO}-d_6$  solution.

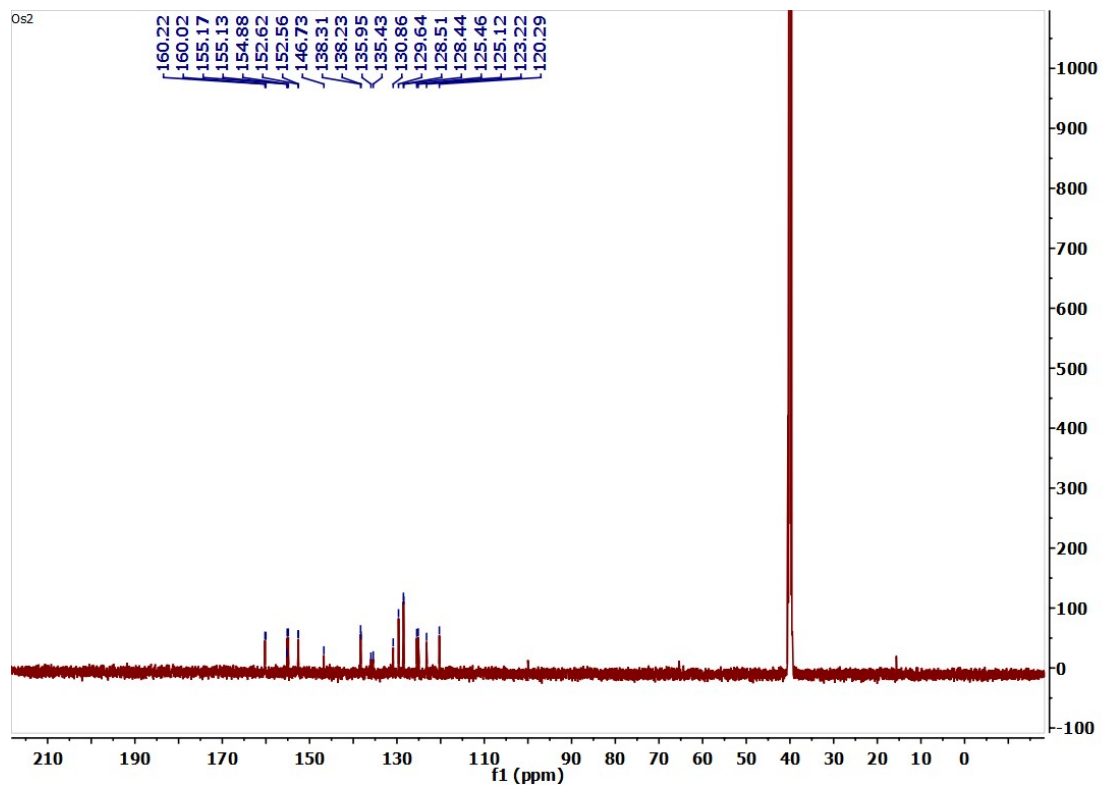

Figure S5. The 126 MHz  $^{13}\text{C}$  NMR spectrum of **Os2** in the  $\text{DMSO-d}_6$  solution.

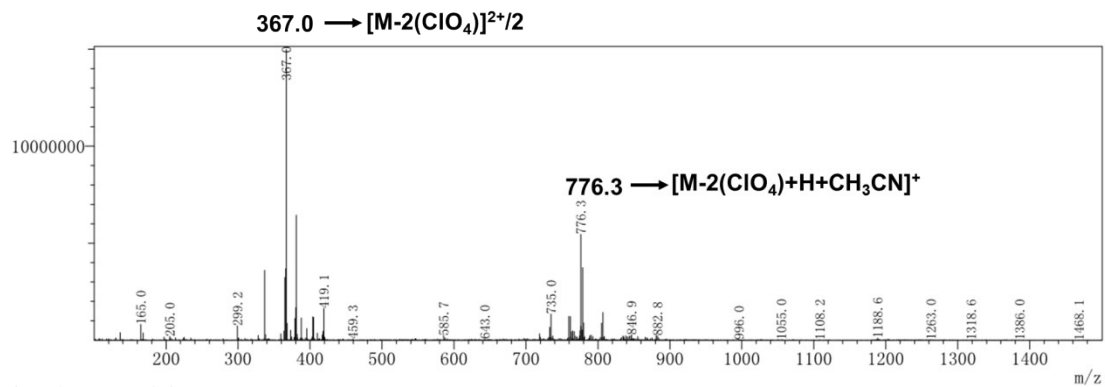

Figure S6. The ESI-MS spectrum of **Os2** ( $\text{CH}_3\text{OH}$ ).

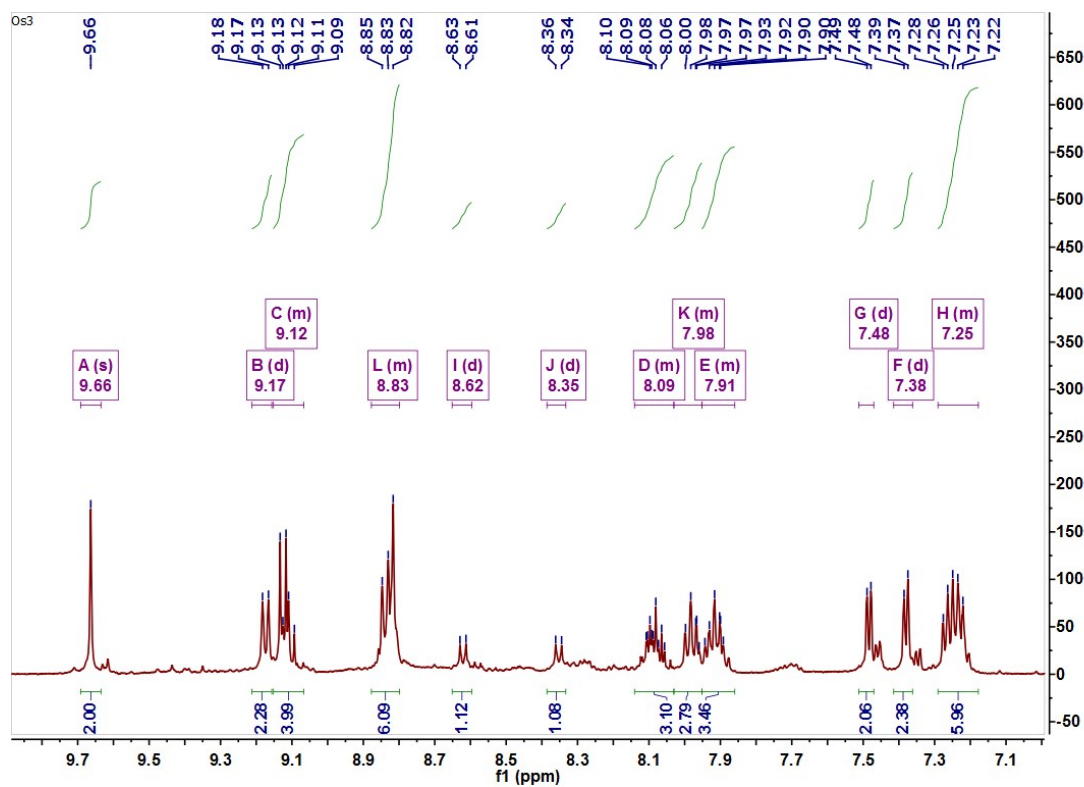

Figure S7. The 500 MHz  $^1\text{H}$  NMR spectrum of Os3 in the DMSO- $d_6$  solution.

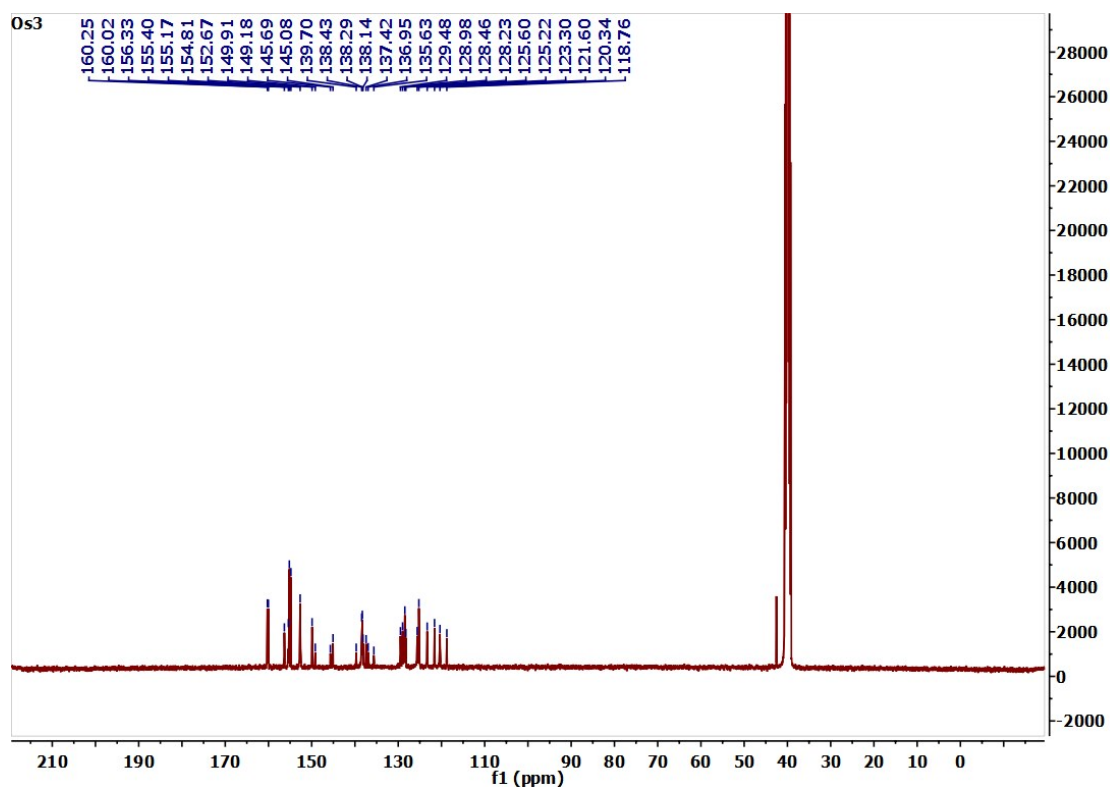

Figure S8. The 126 MHz  $^{13}\text{C}$  NMR spectrum of Os3 in the DMSO- $d_6$  solution.

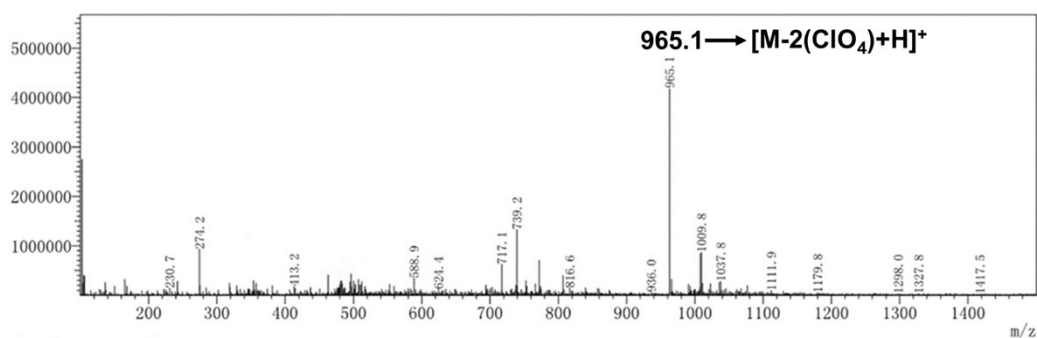

**Figure S9.** The ESI-MS spectrum of **Os3** (CH<sub>3</sub>OH).

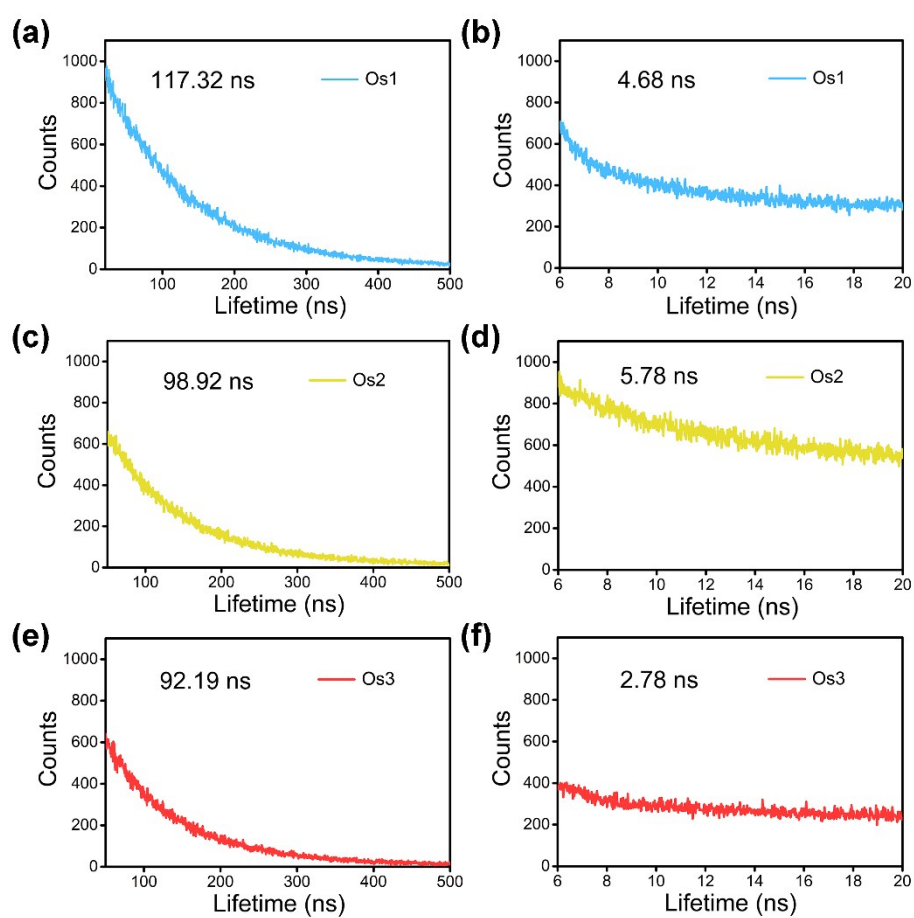

**Figure S10.** The phosphorescence lifetimes of **Os1-Os3** in water. The excitation wavelength was 488 nm. (a), (c) and (e) were collected NIR emission from 700-750 nm. (b), (d) and (f) were collected Vis emission from 550-600 nm.

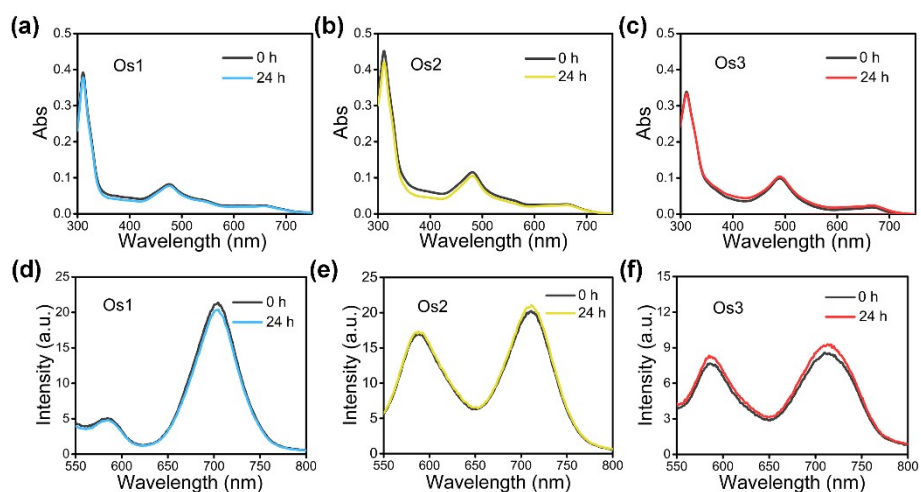

**Figure S11.** The absorption (a-c) and emission (d-f) spectra of **Os1-Os3** (10  $\mu\text{M}$ ) in PBS solution for 24 h at room temperature.

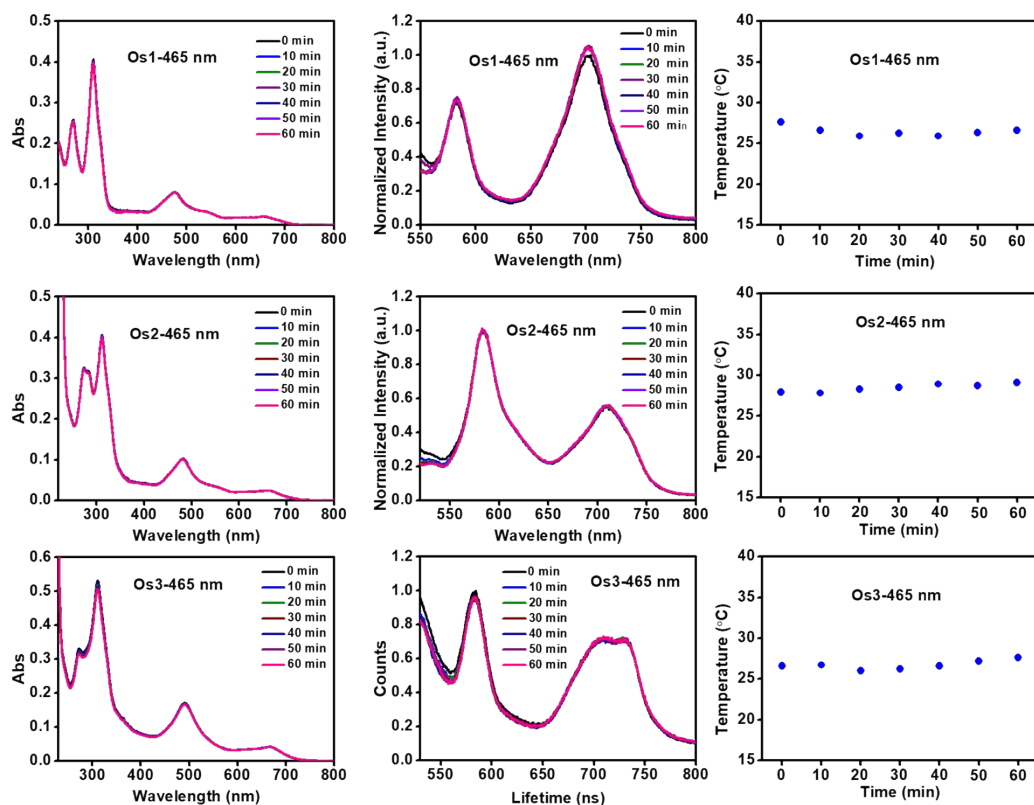

**Figure S12.** The photostability of **Os1-Os3** in PBS solution, as monitored by UV-vis spectroscopy (left) and fluorescence spectrometer (middle), which recorded every 10 min under blue LED light irradiation (465 nm, 13  $\text{mW}/\text{cm}^2$ ). The changes of temperature of **Os1-Os3** solution after irradiation was recorded as well (right).



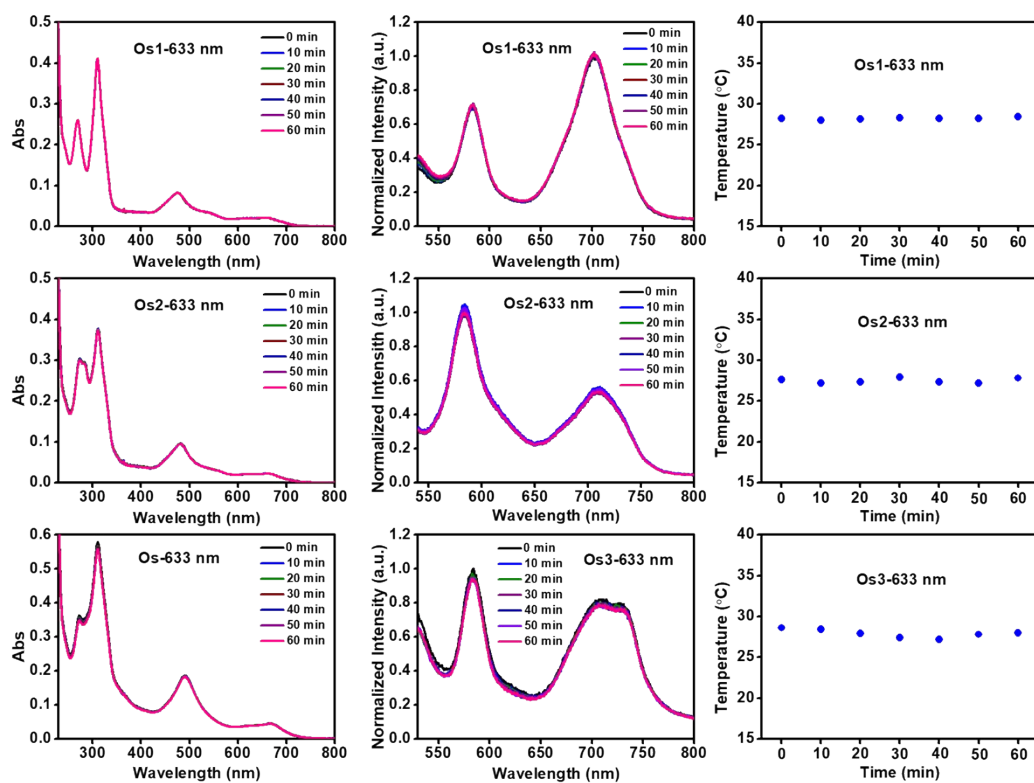

**Figure S13.** The photostability of **Os1-Os3** in PBS solution, as monitored by UV-vis spectroscopy (left) and fluorescence spectrometer (middle), which recorded every 10 min under blue LED light irradiation (633 nm, 20 mW/cm<sup>2</sup>). The changes of temperature of **Os1-Os3** solution after irradiation was recorded as well (right).

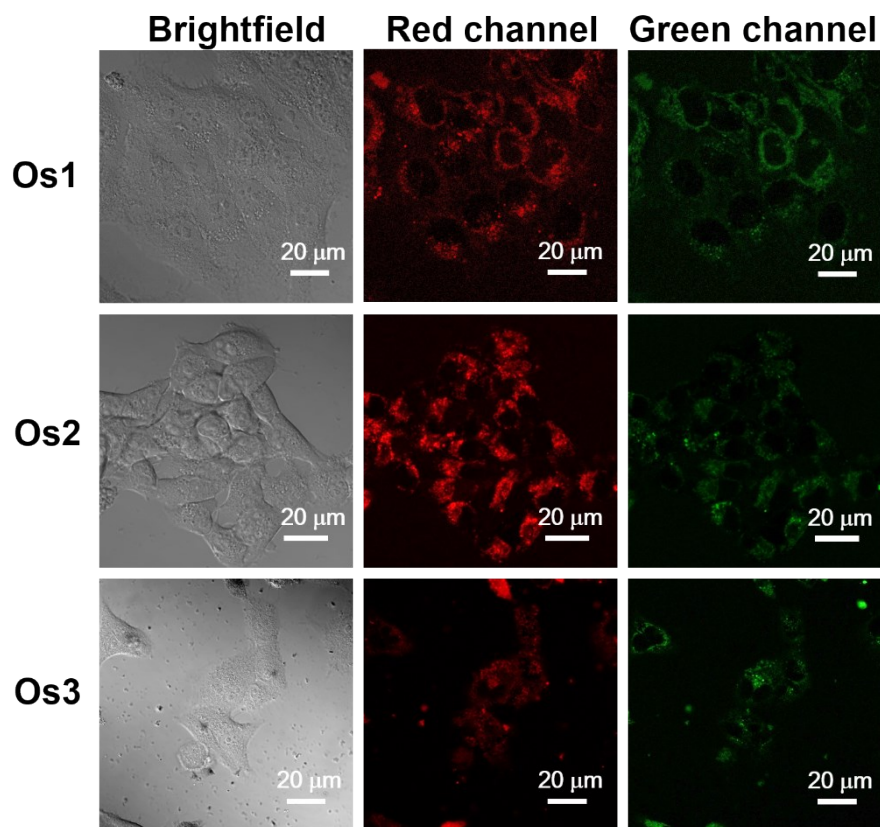

**Figure S14.** Images of live Hep-G2 cells stained with **Os1-Os3** (10  $\mu$ M) for 2 h. Red channel:  $\lambda_{\text{ex}} = 488$  nm,  $\lambda_{\text{em}} = 650-800$  nm. Green channel:  $\lambda_{\text{ex}} = 488$  nm,  $\lambda_{\text{em}} = 550-600$  nm. Scale bar: 20  $\mu$ m.

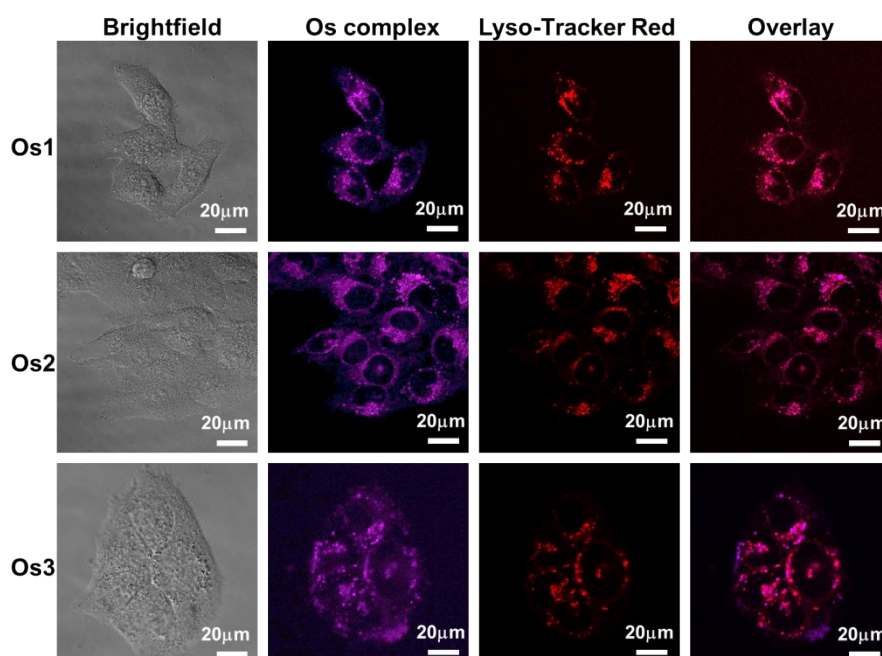

**Figure S15.** Confocal microscopy images of Hep-G2 cells treated with complexes **Os1-Os3** (10  $\mu$ M, 2 h) and Lyso-Tracker Red (100 nM) for 30 min. Os complexes Red channel:  $\lambda_{\text{ex}} = 488$  nm,  $\lambda_{\text{em}} = 650-800$  nm. Lyso-Tracker Red channel:  $\lambda_{\text{ex}} = 543$  nm,  $\lambda_{\text{em}} = 560-620$  nm.

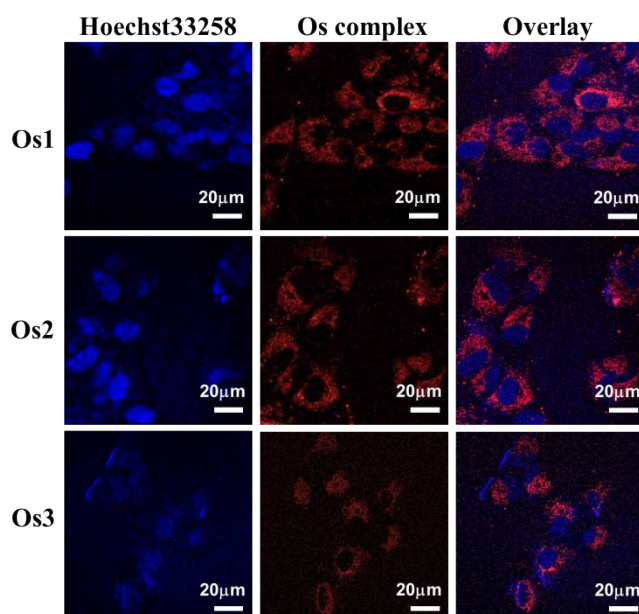

**Figure S16.** Confocal images of the A549 cells colabeled with **Os1-Os3** (10  $\mu$ M, 2 h) and Hoechst 33258 (500 nM, 30 min).

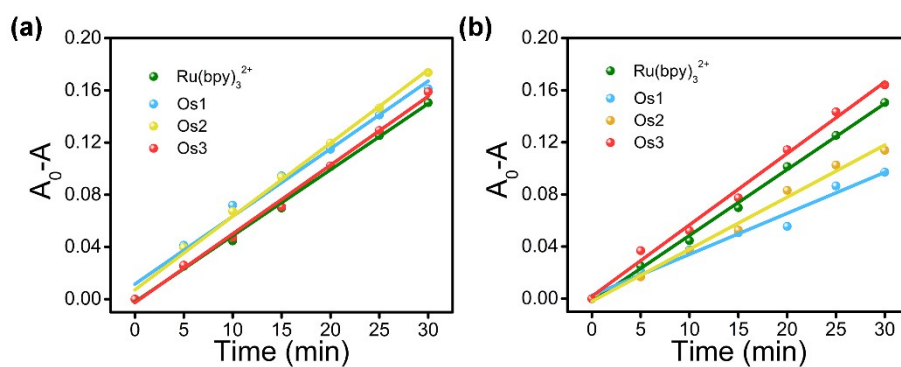

**Figure S17.** Changes in absorbance of RNO at 440 nm against irradiation time in the presence of  $\text{Ru}(\text{bpy})_3^{2+}$  or **Os1-Os3** in histidine-PBS solution. The irradiation time interval was 5 min. The light source was a 465 nm LED- lamp (a) and a 633 nm LED-lamp (b).

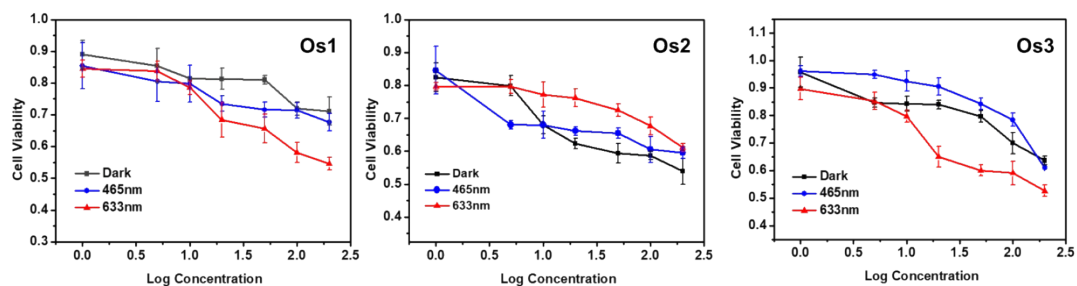

**Figure S18.** Growth curves for the LO2 cells treated with **Os1**, **Os2** or **Os3** for 4 h in the dark or followed by irradiation with 465 nm (13 mW cm<sup>-2</sup>, 1 h) or 633 nm light (20 mW cm<sup>-2</sup>, 1 h), and then incubated for a further 43 h. The cells were transferred to fresh medium before irradiation.

**Table S1.** Data of the HOMO-LUMO values of **Os1-Os3**.

| Complex    | HOMO-LUMO |
|------------|-----------|
| <b>Os1</b> | 9.64 eV   |
| <b>Os2</b> | 5.38 eV   |
| <b>Os3</b> | 4.70 eV   |

**Table S2.** The IC<sub>50</sub> values of **Os1-Os3** towards Hep-G2 and LO2 cells in the dark and upon irradiation.

| Cell lines | Complex    | IC <sub>50</sub> (μM) |            |            |
|------------|------------|-----------------------|------------|------------|
|            |            | Dark                  | 465 nm     | 633 nm     |
| Hep-G2     | <b>Os1</b> | > 100                 | 71.83±3.32 | > 100      |
|            | <b>Os2</b> | > 100                 | 43.47±2.48 | 58.18±0.48 |
|            | <b>Os3</b> | > 100                 | 1.23±0.12  | 4.05±0.05  |
| LO2        | <b>Os1</b> | > 100                 | > 100      | > 100      |
|            | <b>Os2</b> | > 100                 | > 100      | > 100      |
|            | <b>Os3</b> | > 100                 | > 100      | > 100      |

**Table S3.** The TON values of the osmium complexes for photo-oxidation of NADH.

| Complex    | Condition | TON          |
|------------|-----------|--------------|
| <b>Os1</b> | Dark      | 0.076±0.0035 |
|            | 465 nm    | 11.35±0.014  |
|            | 633 nm    | 6.44±0.20    |
| <b>Os2</b> | Dark      | 0.16±0.028   |
|            | 465 nm    | 7.03±0.13    |
|            | 633 nm    | 3.41±0.078   |
| <b>Os3</b> | Dark      | 0.14±0.035   |
|            | 465 nm    | 11.40±0.17   |
|            | 633 nm    | 11.13±0.14   |
